# Supplementary material
Source: PubMed Central journal article supplement (PMC8256256)
Supplement: DS_10.1177_0022034520942208.pdf [file DS_10.1177_0022034520942208.pdf]

Supplement 1: Contact details and funding of the 15 OHBC studies.

| Study                                                                                  | Principal Investigator             | e-mail                   | Website                                                                                                                                                   | Funding                                                                                                                                                                                                                                                                                                 |
|----------------------------------------------------------------------------------------|------------------------------------|--------------------------|-----------------------------------------------------------------------------------------------------------------------------------------------------------|---------------------------------------------------------------------------------------------------------------------------------------------------------------------------------------------------------------------------------------------------------------------------------------------------------|
| <sup>1</sup> Queensland Birth Cohort Childhood Caries Study.                           | W. Kim Seow                        | k.seow@uq.edu.au         | N/A                                                                                                                                                       | National Health and Medical Research Council of Australia (NHMRC Grant No.1046779 ); Queensland Health                                                                                                                                                                                                  |
| <sup>2</sup> Study of Mothers' and Infants' Life Events Affecting Oral Health (SMILE). | Loc Giang Do                       | loc.do@adelaide.edu.au   | <a href="https://www.adelaide.edu.au/arc_poh/smile-study/">https://www.adelaide.edu.au/arc_poh/smile-study/</a>                                           | National Health and Medical Research Council                                                                                                                                                                                                                                                            |
| <sup>3</sup> 1982 Pelotas Birth Cohort Study                                           | Bernardo Lessa Horta               | blhorta@gmail.com        | <a href="http://www.epidemioufpel.org.br/site/content/coorte_1982-en/index.php">http://www.epidemioufpel.org.br/site/content/coorte_1982-en/index.php</a> | Wellcome Trust Initiative, International Development Research Center, The World Health Organization, Overseas Development Administration, European Union, National Support Program for Centers of Excellence (PRONEX), the Brazilian National Research Council (CNPq) and Brazilian Ministry of Health. |
| <sup>4</sup> 1993 Pelotas Birth Cohort Study                                           | Helen Denise Gonçalves da Silva    | hdgs.epi@gmail.com       | <a href="http://www.epidemioufpel.org.br/site/content/coorte_1993-en/index.php">http://www.epidemioufpel.org.br/site/content/coorte_1993-en/index.php</a> | Wellcome Trust Initiative, European Union, National Support Program for Centers of Excellence (PRONEX), the Brazilian National Research Council (CNPq) and Brazilian Ministry of Health.                                                                                                                |
| <sup>5</sup> 2004 Pelotas Birth Cohort Study                                           | Aluisio Jardim Dornellas de Barros | abarro.s.epi@gmail.com   | <a href="http://www.epidemioufpel.org.br/site/content/coorte_2004-en/index.php">http://www.epidemioufpel.org.br/site/content/coorte_2004-en/index.php</a> | Wellcome Trust Initiative, International Development Research Center, The World Health Organization, Overseas Development Administration, European Union, National Support Program for Centers of Excellence (PRONEX), the Brazilian National Research Council (CNPq) and Brazilian Ministry of Health. |
| <sup>6</sup> 2015 Pelotas Birth Cohort Study                                           | Pedro Rodrigues Cury Hallal        | prchallal@gmail.com      | <a href="http://www.epidemioufpel.org.br/site/content/coorte_2015-en/index.php">http://www.epidemioufpel.org.br/site/content/coorte_2015-en/index.php</a> | Wellcome Trust, the Brazilian Public Health Association (ABRASCO), the Brazilian National Research Council (CNPq), the Coordination for the Improvement of Higher Education Personnel (CAPES)                                                                                                           |
| <sup>7</sup> Porto Alegre Early Life Nutrition and Health Study                        | Márcia Regina Vítolo               | vitolo@ufcs.pa.edu.br    | N/A                                                                                                                                                       | The Brazilian Ministry of Health, the Rio Grande do Sul Research Support Foundation (FAPERGS), the Coordination for the Improvement of Higher Education Personnel (CAPES) , and National Institutes of Health (NIH-NIDCR)                                                                               |
| <sup>8</sup> Sao Leopoldo Ten Steps Healthy Feeding and Nutrition Study                | Márcia Regina Vítolo               | marciavitolo@hotmail.com | N/A                                                                                                                                                       | The Brazilian National Research Council (CNPq), the Coordination for the Improvement of Higher Education (CAPES), Research Support Foundation of the State of Rio Grande do Sul (FAPERGS)                                                                                                               |
| <sup>9</sup> Hong Kong Children of 1997                                                | Hai Ming Wong                      | wonghmg@hku.hk           | <a href="https://www.aprmay97.sph.hku.hk">https://www.aprmay97.sph.hku.hk</a>                                                                             | General Research Fund, The Research Grants Council of the Hong Kong Special Administrative Region, China.                                                                                                                                                                                               |

|                                                                                                      |                        |                               |                                                                                                                                                                                                                                                                                                                                                                           |                                                                                                                                                                                                                                                                                                                                                                   |
|------------------------------------------------------------------------------------------------------|------------------------|-------------------------------|---------------------------------------------------------------------------------------------------------------------------------------------------------------------------------------------------------------------------------------------------------------------------------------------------------------------------------------------------------------------------|-------------------------------------------------------------------------------------------------------------------------------------------------------------------------------------------------------------------------------------------------------------------------------------------------------------------------------------------------------------------|
| <sup>10</sup> Jena Birth Cohort Study                                                                | Yvonne Wagner          | yvonne.wagner@med.uni-jena.de |                                                                                                                                                                                                                                                                                                                                                                           | Bamed AG, Wollerau, Switzerland, VOCO GmbH, Cuxhaven, Germany, MAM Babyartikel GmbH, Vienna, Austria, Procter & Gamble International Operations S.A., Petit-Lancy, Switzerland, Wrigley GmbH, Munich, Germany, German Society of Oral and Maxillofacial Surgery (DGZMK), Germany, and the German Society of Orthodontics (DGKFO)                                  |
| <sup>11</sup> The Dunedin Multidisciplinary Health and Development Study                             | Richie Poulton         | richie.poulton@otago.ac.nz    | <a href="https://dunedinstudy.otago.ac.nz/">https://dunedinstudy.otago.ac.nz/</a>                                                                                                                                                                                                                                                                                         | (dental study only): Health Research Council of NZ; National Institutes of Health                                                                                                                                                                                                                                                                                 |
| <sup>12</sup> The Prospective Cohort Study of Thai Children – Khon Kaen Site                         | Waranuch Pitiphat      | waranuch@kku.ac.th            | N/A                                                                                                                                                                                                                                                                                                                                                                       | The main study was supported by the Thailand Research Fund, the Health System Research Institute, Thailand's Ministry of Public Health, DUMEX Science and the World Health Organization. The dental substudy was supported by the Thailand Research Fund and Khon Kaen University                                                                                 |
| <sup>13</sup> The Oral Health Cohort Study is a subsample of Ugandan cohort of the PROMISE-EBF study | Anne Nordrehaug Åstrøm | Anne.Aastrom@uib.no           | <a href="https://www.uib.no/en/cih/67190/promise-ebf-safety-and-efficacy-exclusive-breastfeeding-promotion-era-hiv">https://www.uib.no/en/cih/67190/promise-ebf-safety-and-efficacy-exclusive-breastfeeding-promotion-era-hiv</a>                                                                                                                                         | European Union 6th Framework Programme (FP6) / The Research Council of Norway / Sida/Sarec, Sweden / Medical Research Council, South Africa                                                                                                                                                                                                                       |
| <sup>14</sup> Caries Risk Study-US                                                                   | Margherita Fontana     | mfontan@umich.edu             | <a href="https://projectreporter.nih.gov/project_info_description.cfm?aid=9751077&amp;icde=46636187&amp;ddparam=&amp;ddvalue=&amp;ddsub=&amp;cr=2&amp;csb=default&amp;cs=ASC&amp;pbll=">https://projectreporter.nih.gov/project_info_description.cfm?aid=9751077&amp;icde=46636187&amp;ddparam=&amp;ddvalue=&amp;ddsub=&amp;cr=2&amp;csb=default&amp;cs=ASC&amp;pbll=</a> | National Institute of Dental and Craniofacial Research                                                                                                                                                                                                                                                                                                            |
| <sup>15</sup> The Iowa Fluoride Study (IFS)                                                          | Steven M. Levy         | steven-levy@uiowa.edu         | N/A                                                                                                                                                                                                                                                                                                                                                                       | National Institutes of Health ( grant numbers R03-DE023784, R01-DE12101, R01-DE09551, UL1-RR024979, UL1-TR000442, UL1-TR001013, M01-RR00059 R03-DE023784, R01-DE12101, R01-DE09551, UL1-RR024979, UL1-TR000442, UL1-TR001013, M01-RR00059; The Roy J. Carver Charitable Trust, Delta Dental of Iowa Foundation and the Centers for Disease Control and Prevention |
